# Supplementary material for: Parallel DNA pyrosequencing unveils new zebrafish microRNAs
Source: PubMed Central journal article supplement (PMC2684549; doi:10.1186/1471-2164-10-195), 2009-04-27

## Additional File 1, Figure A1 – Data pipeline analysis.

Flowchart describing the procedure used for identify microRNAs in pyrosequencing data. **(A)** includes miRDeep analysis and **(B)** further processing of miRDeep discarded reads. The red boxes stand for data coming from databases. -i and -d stands for query file and database respectively.

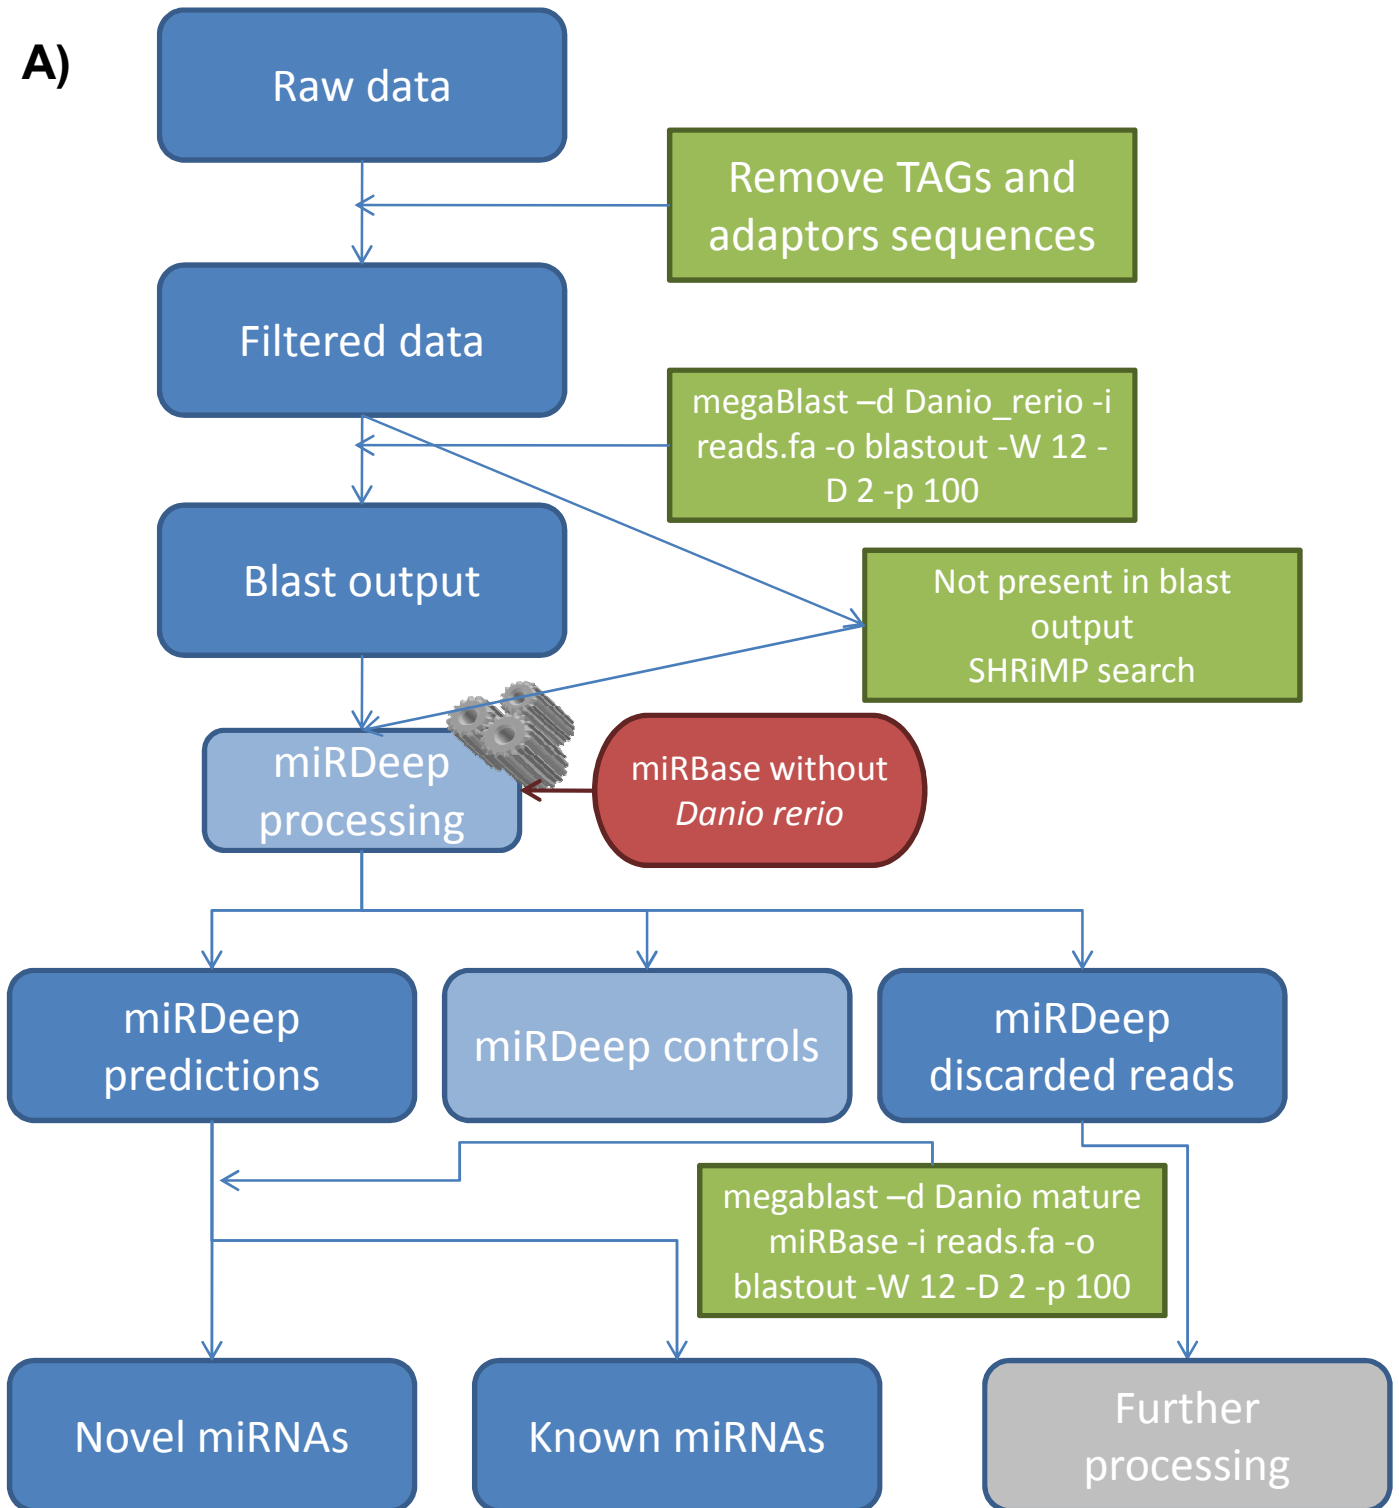

B)

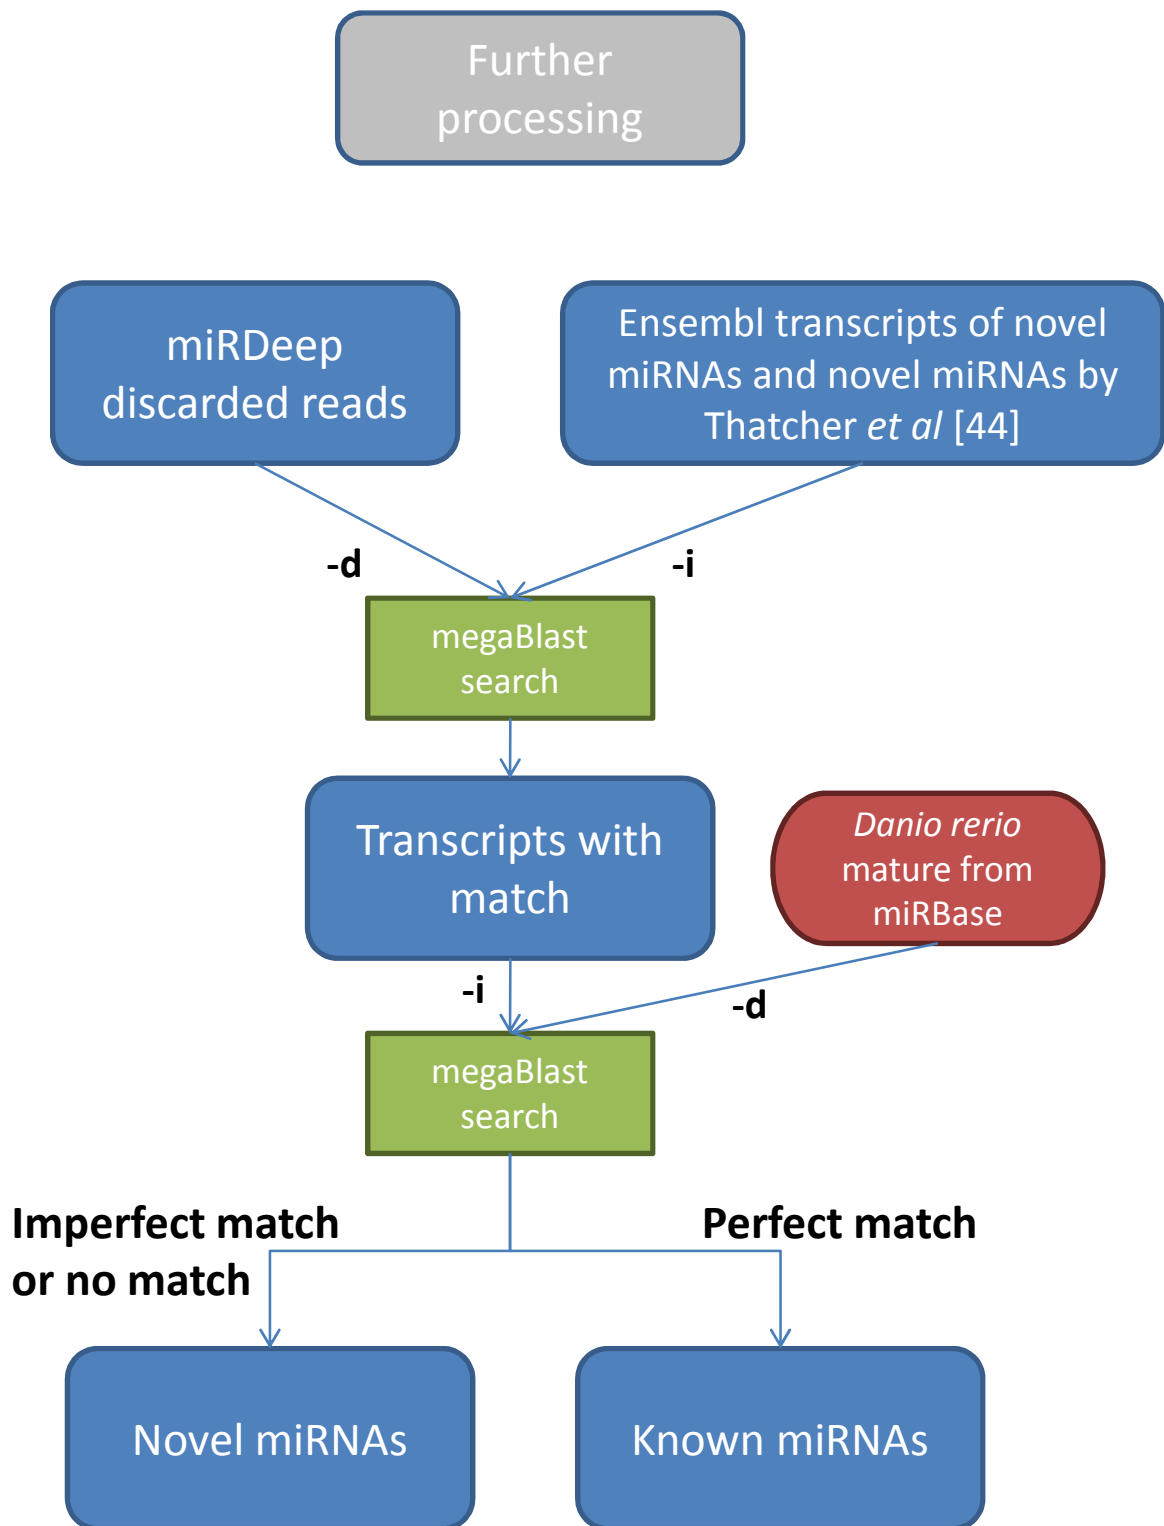

Supplement: 1471-2164-10-195-S1.pdf [file 1471-2164-10-195-S1.pdf]
